# Supplementary material
Source: Springer Nature journal article supplement (https://www.springermedizin.de/resource/supplementary/12889_2012_5110_MOESM5_ESM.pdf/9496600)

Sensitivity to X-ray cost (Range US\$ 2 – 6)

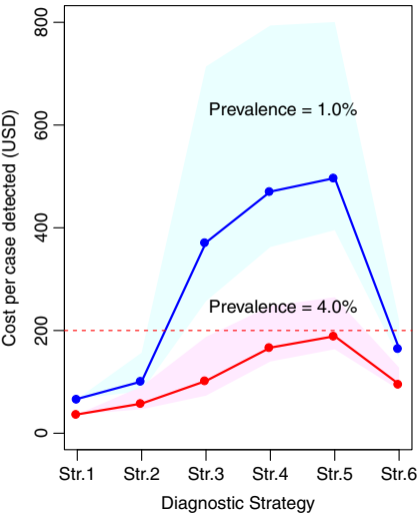

Sensitivity to proportional yield assumptions

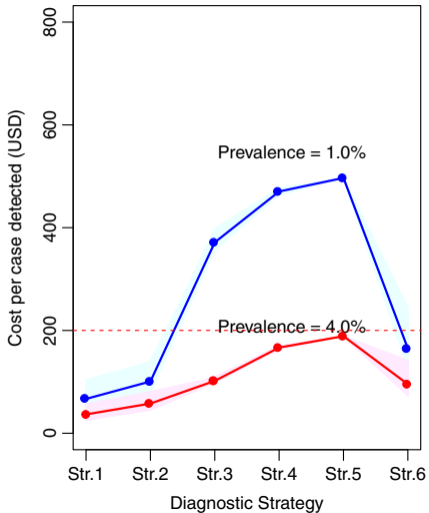

Supplement: MOESM5 [file 9496600]
